# Supplementary material
Source: PubMed Central journal article supplement (PMC1868445)
Supplement: NIHMS17820-supplement-01.pdf [file NIHMS17820-supplement-01.pdf]

Supplementary Table A. Sharman *et al.*, Affymetrix Mouse Genome 430 GeneArray quality control data

| Criterion | Chip     | Noise | Scale             | TGT   | % Number   |         | Actin | GAPDH | BIOB               | BIOC               |
|-----------|----------|-------|-------------------|-------|------------|---------|-------|-------|--------------------|--------------------|
|           |          | Raw Q | Factor            | Value | Background | Present | 3'/5' | 3'/5' | Spike              | Spike              |
|           |          | < 5   | <i>consistent</i> |       | < 200      | > 50%   | < 3.0 | < 3.0 | <i>appropriate</i> | <i>appropriate</i> |
|           | YC2      | 2.29  | 1.338             | 500   | 75.88      | 50.40%  | 1.25  | 0.75  | 322.96             | 770.74             |
|           | YC4      | 1.95  | 1.547             | 500   | 57.35      | 52.80%  | 1.19  | 0.75  | 331.24             | 722.60             |
|           | YC6      | 1.99  | 1.411             | 500   | 63.70      | 51.70%  | 1.27  | 0.75  | 281.00             | 630.52             |
|           | YC1 LPS  | 2.24  | 1.451             | 500   | 72.25      | 51.70%  | 1.26  | 0.75  | 320.59             | 739.84             |
|           | YC3 LPS  | 1.80  | 1.743             | 500   | 60.39      | 52.00%  | 1.16  | 0.77  | 326.22             | 707.73             |
|           | YC5 LPS  | 2.03  | 1.537             | 500   | 70.77      | 50.50%  | 1.22  | 0.75  | 315.58             | 617.53             |
|           | OC2      | 2.21  | 1.538             | 500   | 75.39      | 51.30%  | 1.22  | 0.75  | 319.66             | 739.04             |
|           | OC4      | 1.98  | 1.711             | 500   | 72.17      | 49.70%  | 1.16  | 0.74  | 267.23             | 606.98             |
|           | OC8      | 1.95  | 1.727             | 500   | 68.31      | 52.20%  | 1.18  | 0.78  | 273.45             | 631.22             |
|           | OC1 LPS  | 2.28  | 1.365             | 500   | 70.30      | 52.40%  | 1.14  | 0.76  | 341.98             | 644.72             |
|           | OC3 LPS  | 2.00  | 1.454             | 500   | 70.81      | 53.20%  | 1.27  | 0.73  | 328.43             | 733.72             |
|           | OC7 LPS  | 1.98  | 1.687             | 500   | 69.74      | 51.60%  | 1.18  | 0.76  | 321.48             | 627.11             |
|           | OM9      | 2.29  | 1.561             | 500   | 78.03      | 51.90%  | 1.19  | 0.79  | 329.25             | 654.44             |
|           | OM11     | 2.00  | 1.649             | 500   | 70.09      | 51.30%  | 1.18  | 0.77  | 332.26             | 688.29             |
|           | OM13     | 1.92  | 1.443             | 500   | 61.51      | 52.30%  | 1.24  | 0.78  | 295.18             | 639.14             |
|           | OM8 LPS  | 2.19  | 1.557             | 500   | 77.09      | 50.70%  | 1.23  | 0.75  | 300.08             | 653.71             |
|           | OM10 LPS | 2.18  | 1.539             | 500   | 72.52      | 52.00%  | 1.24  | 0.74  | 345.90             | 695.18             |
|           | OM12 LPS | 2.11  | 1.576             | 500   | 76.84      | 51.50%  | 1.24  | 0.76  | 269.16             | 620.91             |
